# Supplementary material
Source: PubMed Central journal article supplement (PMC3900879)
Supplement: NIHMS543613-supplement-01.pdf [file NIHMS543613-supplement-01.pdf]

**Supplemental Data:**

| <b>Table 1: Univariable Analyses for Association with Death, Heart Failure Admission, or the development of late recurrent atrial fibrillation</b> |      |           |             |                |
|----------------------------------------------------------------------------------------------------------------------------------------------------|------|-----------|-------------|----------------|
|                                                                                                                                                    | HR   | CI        | LR $\chi^2$ | <i>p</i> Value |
| <b>Age</b>                                                                                                                                         | 1.02 | 0.99-1.03 | 3.12        | 0.09           |
| <b>Male</b>                                                                                                                                        | 1.01 | 0.99-1.03 | 0.12        | 0.72           |
| <b>Hypertension Duration</b>                                                                                                                       | 1.00 | 0.99-1.01 | 1.21        | 0.27           |
| <b>Atrial Fibrillation Duration</b>                                                                                                                | 1.00 | 0.99-1.01 | 0.01        | 0.91           |
| <b>Cigarette Smoking</b>                                                                                                                           | 0.99 | 0.39-2.47 | 0.01        | 0.97           |
| <b>Sleep Apnea</b>                                                                                                                                 | 1.87 | 1.02-3.43 | 4.10        | 0.04           |
| <b>Hyperthyroidism</b>                                                                                                                             | 0.65 | 0.16-2.68 | 0.35        | 0.55           |
| <b>Excess Alcohol Intake</b>                                                                                                                       | 1.38 | 0.55-3.46 | 0.46        | 0.49           |
| <b>Family History of Hypertension</b>                                                                                                              | 0.93 | 0.47-1.86 | 0.04        | 0.85           |
| <b>Hyperlipidemia</b>                                                                                                                              | 0.77 | 0.44-1.34 | 0.88        | 0.35           |
| <b><u>Medications:</u></b>                                                                                                                         |      |           |             |                |
| • <b>Thiazide Diuretic</b>                                                                                                                         | 1.17 | 0.68-1.97 | 0.32        | 0.57           |
| • <b>Loop Diuretic</b>                                                                                                                             | 0.86 | 0.27-2.75 | 0.06        | 0.80           |
| • <b>ACE</b>                                                                                                                                       | 1.01 | 0.60-1.71 | 0.01        | 0.97           |
| • <b>ARB</b>                                                                                                                                       | 0.93 | 0.51-1.70 | 0.06        | 0.81           |
| • <b>Beta-Blocker</b>                                                                                                                              | 0.99 | 0.56-1.78 | 0.01        | 0.98           |
| • <b>Calcium Channel Blocker</b>                                                                                                                   | 0.85 | 0.49-1.47 | 0.36        | 0.55           |

|                                      |      |           |      |      |
|--------------------------------------|------|-----------|------|------|
| • ASA                                | 0.97 | 0.55-1.72 | 0.01 | 0.93 |
| • Class 1/Class 3 Anti-Arrhythmic    | 1.02 | 0.99-1.06 | 2.40 | 0.15 |
| • Statin Therapy                     | 0.85 | 0.49-1.46 | 0.36 | 0.55 |
| • Inhibition of aldosterone receptor | 0.79 | 0.34-1.84 | 0.30 | 0.58 |
| • Alpha Blocker                      | 0.98 | 0.36-2.72 | 0.01 | 0.97 |
| • Digoxin                            | 0.75 | 0.10-5.45 | 0.08 | 0.78 |
| <b>BMI</b>                           | 1.01 | 0.95-1.07 | 0.03 | 0.85 |
| <b>Systolic Blood Pressure</b>       | 1.01 | 0.99-1.02 | 0.38 | 0.53 |
| <b>Diastolic Blood Pressure</b>      | 1.02 | 0.99-1.05 | 2.43 | 0.12 |
| <b>Heart Rate</b>                    | 1.00 | 0.98-1.02 | 0.01 | 0.98 |
| <b>Glomerular Filtration Rate</b>    | 0.96 | 0.92-1.02 | 2.44 | 0.10 |
| <b>Hematocrit</b>                    | 1.01 | 0.99-1.01 | 0.08 | 0.77 |
| <b>EKG Parameters:</b>               |      |           |      |      |
| • AV Delay                           | 0.99 | 0.99-1.01 | 0.15 | 0.69 |
| • QRS Interval                       | 1.00 | 0.99-1.02 | 0.81 | 0.36 |
| • QTc Interval                       | 1.00 | 0.99-1.01 | 0.01 | 0.99 |
| • LVH (EKG)                          | 0.97 | 0.43-2.08 | 0.42 | 0.48 |
| <b>Echocardiographic Parameters:</b> |      |           |      |      |
| • LVEF                               | 0.98 | 0.94-1.02 | 0.87 | 0.35 |
| • LVIDd                              | 0.99 | 0.95-1.05 | 0.01 | 0.89 |
| • Estimated PASP                     | 1.03 | 0.99-1.08 | 2.17 | 0.14 |
| • Transmitral E velocity             | 1.00 | 0.99-1.01 | 0.25 | 0.62 |

|                                        |      |           |      |         |
|----------------------------------------|------|-----------|------|---------|
| • <b>Transmitral A velocity</b>        | 1.00 | 0.99-1.02 | 0.38 | 0.53    |
| • <b>E/A ratio</b>                     | 1.35 | 0.73-2.51 | 0.90 | 0.34    |
| • <b>Deceleration Time</b>             | 1.00 | 0.99-1.01 | 0.55 | 0.46    |
| • <b>e' Lateral</b>                    | 0.87 | 0.72-1.04 | 2.29 | 0.12    |
| • <b>e' Medial</b>                     | 0.86 | 0.71-1.03 | 2.45 | 0.07    |
| <b>Cardiac Magnetic Resonance:</b>     |      |           |      |         |
| • <b>LVEDV</b>                         | 1.00 | 0.99-1.01 | 0.23 | 0.64    |
| • <b>LVESV</b>                         | 1.00 | 0.99-1.02 | 0.42 | 0.52    |
| • <b>LVEF</b>                          | 1.03 | 0.99-1.07 | 1.78 | 0.18    |
| • <b>LV Mass index</b>                 | 1.02 | 1.00-1.03 | 5.25 | 0.02    |
| • <b>RVEDV</b>                         | 1.00 | 0.99-1.01 | 1.74 | 0.19    |
| • <b>RVESV</b>                         | 1.00 | 0.99-1.01 | 1.35 | 0.24    |
| • <b>RVEF</b>                          | 1.00 | 0.96-1.05 | 0.02 | 0.86    |
| • <b>Indexed Maximal LA volume</b>     | 1.02 | 1.00-1.03 | 4.71 | 0.03    |
| • <b>Indexed Minimal LA Volume</b>     | 1.03 | 1.00-1.06 | 5.47 | 0.02    |
| • <b>Extracellular Volume Fraction</b> | 1.35 | 1.21-1.51 | 24.6 | <0.0001 |

Abbreviations as per Table 4

| <b>Table 2: Multivariate model for Association with Death, Heart Failure Admission or the development of recurrent Atrial Fibrillation</b> |      |           |             |                |
|--------------------------------------------------------------------------------------------------------------------------------------------|------|-----------|-------------|----------------|
|                                                                                                                                            | HR   | CI        | LR $\chi^2$ | <i>p</i> Value |
| <b>Sleep Apnea</b>                                                                                                                         | 2.06 | 1.11-3.84 | 5.18        | 0.02           |

|                                      |      |           |      |         |
|--------------------------------------|------|-----------|------|---------|
| <b>LV Mass index</b>                 | 1.00 | 0.99-1.01 | 1.00 | 0.76    |
| <b>Indexed Minimal LA Volume</b>     | 1.02 | 0.99-1.04 | 2.39 | 0.12    |
| <b>Extracellular Volume Fraction</b> | 1.24 | 1.19-1.29 | 19.8 | <0.0001 |

Abbreviations as per Table 4

**Figure 1:**

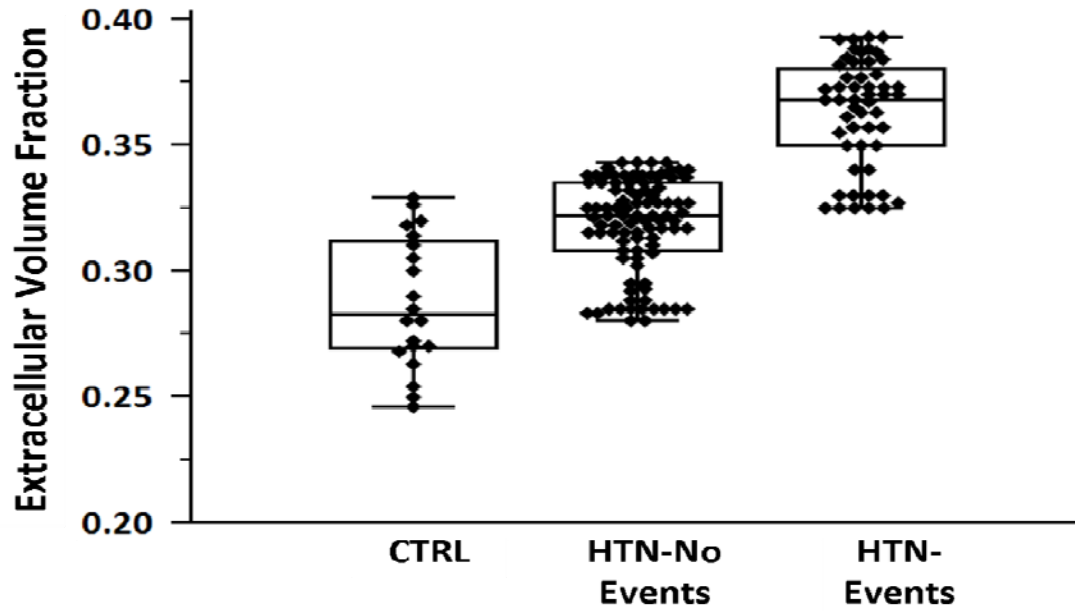

Figure 2:

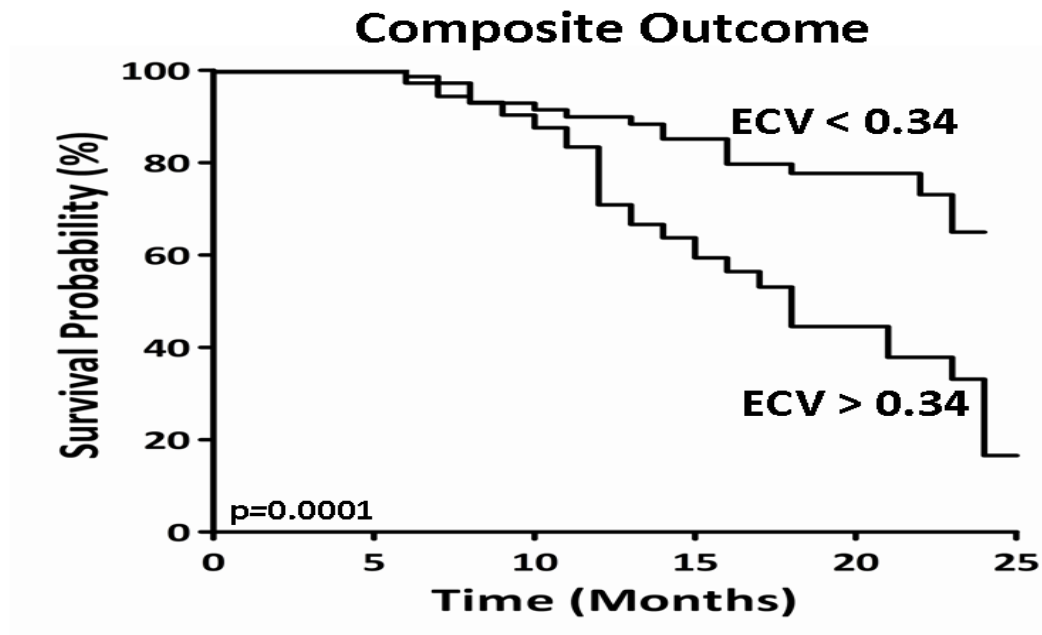

**Number at Risk**

|            |    |    |    |    |    |   |
|------------|----|----|----|----|----|---|
| ECV > 0.34 | 72 | 72 | 65 | 44 | 22 | 2 |
| ECV < 0.34 | 73 | 73 | 63 | 49 | 30 | 1 |
